# Supplementary material
Source: PubMed Central journal article supplement (PMC6952060)
Supplement: NIHMS1065731-supplement-SI.pdf [file NIHMS1065731-supplement-SI.pdf]

In the format provided by the authors and unedited.

# The structure of the periplasmic FlaG-FlaF complex and its essential role for archaeellar swimming motility

Chi-Lin Tsai<sup>1,10</sup>, Patrick Tripp<sup>2,3,10</sup>, Shamphavi Sivabalasarma<sup>2</sup>, Changyi Zhang<sup>4,5</sup>,  
Marta Rodriguez-Franco<sup>6</sup>, Rebecca L. Wipfler<sup>7</sup>, Paushali Chaudhury<sup>2</sup>, Ankan Banerjee<sup>7</sup>,  
Morgan Beeby<sup>8</sup>, Rachel J. Whitaker<sup>4,5</sup>, John A. Tainer<sup>1,9\*</sup> and Sonja-Verena Albers<sup>2,3\*</sup>

<sup>1</sup>Department of Molecular and Cellular Oncology, The University of Texas MD Anderson Cancer Center, Houston, TX, USA. <sup>2</sup>Molecular Biology of Archaea, Institute of Biology II, Faculty of Biology, University of Freiburg, Freiburg, Germany. <sup>3</sup>Spemann Graduate School of Biology and Medicine, University of Freiburg, Freiburg, Germany. <sup>4</sup>Carl R. Woese Institute for Genomic Biology, University of Illinois at Urbana-Champaign, Urbana, IL, USA. <sup>5</sup>Department of Microbiology, University of Illinois at Urbana-Champaign, Urbana, IL, USA. <sup>6</sup>Cell Biology, Institute of Biology II, Faculty of Biology, University of Freiburg, Freiburg, Germany. <sup>7</sup>Molecular Biology Program, Sloan-Kettering Institute, New York, NY, USA. <sup>8</sup>Department of Life Sciences, Imperial College London, London, UK. <sup>9</sup>Molecular Biophysics and Integrated Bioimaging Division, Lawrence Berkeley National Laboratory, Berkeley, CA, USA. <sup>10</sup>These authors contributed equally: C.-L. Tsai, P. Tripp. \*e-mail: [jtainer@mdanderson.org](mailto:jtainer@mdanderson.org); [sonja.albers@biologie.uni-freiburg.de](mailto:sonja.albers@biologie.uni-freiburg.de)

## Supplementary Results

**Structural analysis of the tetrameric FlaF/G complex.** The solved complex structure exhibited four molecules per asymmetric unit and unusually high solvent content ~76%. Analysis of the complex assemblies by PISA<sup>1</sup> showed the sFlaG/F tetrameric complex to be a stable complex with the calculated free energy of the sFlaG/F tetrameric complex  $\Delta G^{\text{assembly}} = -12.0$  kcal/mol and  $\Delta G^{\text{dissociation}} = 18.8$  kcal/mol; and of the sFlaG/F dimer  $\Delta G^{\text{assembly}} = -10.3$  kcal/mol and  $\Delta G^{\text{dissociation}} = 1.5$  kcal/mol. Importantly, the previously shown disordered N-terminal helices of sFlaF (PDB: 4P94) and sFlaG (PDB: 5TUH) became ordered in the sFlaG/F tetrameric complex: they show well-defined connectivity and occupy a distinct region of the electron density map (Supplementary Fig. 2). Supporting the crystal structure complex, the SAXS data of sFlaG/F complex showed a calculated MW ~57 kDa corresponding to a tetrameric complex (Supplementary Table 1), and the sFlaG/F tetramer assemble model with disordered N-terminal His-tag of sFlaG/F generated from MODELLER<sup>2</sup> and MultiFoXS<sup>3</sup> software fits the measured SAXS data with  $\chi^2 = 1.73 \text{ \AA}$  (Supplementary Fig. 3a). The SAXS data furthermore showed the tetrameric complex to be a rigid and well-folded protein shown in a dimensionless Kratky plot (Supplementary Fig. 3b and Supplementary Table 1), which increases confidence in the assemble<sup>4</sup>.

The orientation of the FlaG and FlaF N-termini was pointed in opposite directions, suggesting an alternative oligomeric complex assembly conformation although N-termini of FlaF and FlaG contain the transmembrane sequence (Fig. 2b). However, we do not exclude the possibility of the bipolar direction of FlaG/F N-termini was due to the crystallographic effect. We also observed the annotation of secondary structure of sFlaG N-terminal strands ( $\beta 1$  and  $\beta 2$ ) (Supplementary Fig. 4c-d) is missing from

PDBsum database. We reasoned that N-terminal strands ( $\beta 1$  and  $\beta 2$ ) of sFlaG, which interacts with adjacent sFlaG and sFlaF subunits, only appear in the context of sFlaG/F tetrameric complex while PDBsum uses individual sFlaG structure, which appears to be unstructured on its N-terminal region. In sum, N-terminal strands of sFlaG stabilize the tetramer by intertwining with another sFlaG, which is further stabilized by two adjacent sFlaF proteins via a long  $\alpha$ -helix in addition to hydrophobic interaction in dimer interface.

### **Analysis of FlaF N-glycosylation sites**

Since glycosylation is a common modification to extracellular proteins in Archaea, we reasoned that FlaF might undergo N-glycosylation. Therefore, we identified several Asn residues as good candidates for potential glycosylation sites using NetNGlyc server 1.0<sup>5</sup>. Indeed, the N92A variant of FlaF shows a loss of the higher MW species (upper band), but not the lower band, while the band pattern of the N105A variant did not change (Supplementary Fig. 10a), suggesting that FlaF<sup>N92</sup> is N-glycosylated. The FlaF<sup>N92A</sup>-HA variant lacking glycosylation was still able to complement motility in a  $\Delta aapF\Delta flaF$  background strain (Supplementary Fig. 10b), suggesting that residue N92 glycosylation of FlaF is dispensable for cell motility.

## Supplementary Figures

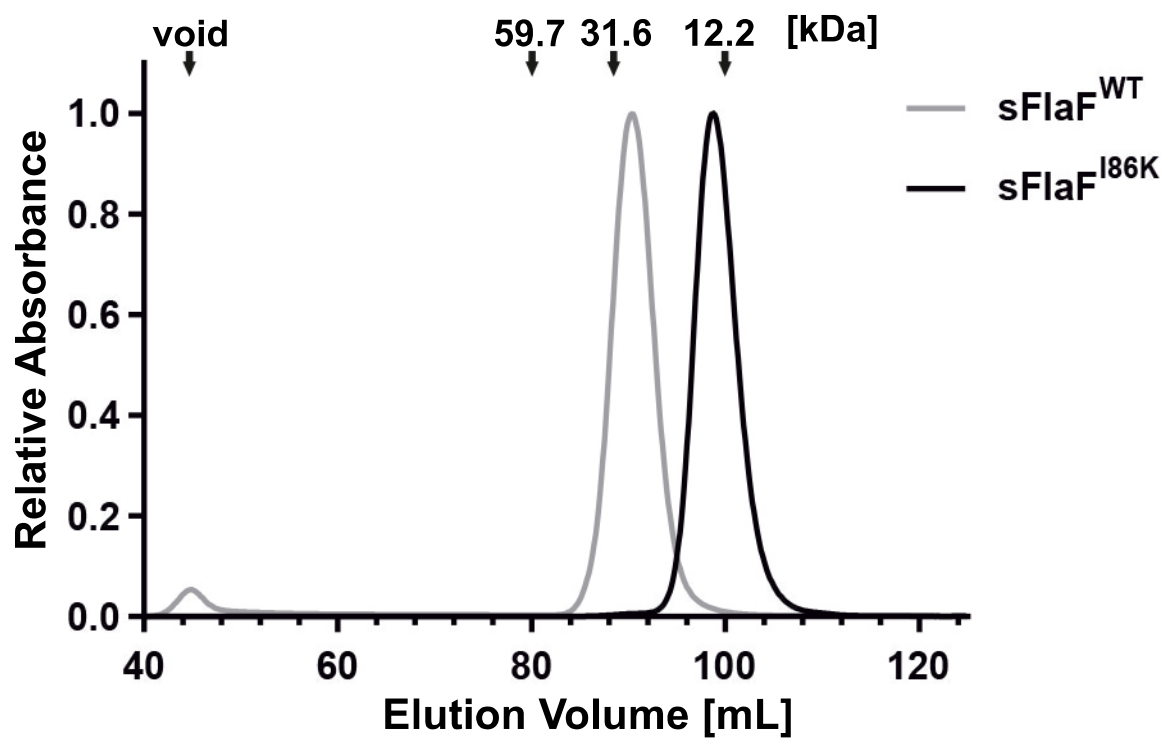

**Supplementary Figure 1: SEC profile of sFlaF variants at pH 3 citric acid buffer.**

The oligomeric states of sFlaF<sup>WT</sup> and sFlaF<sup>I86K</sup> were assessed at pH 3 citric acid buffer by SEC and shown to be consistent with the previously reported dimer and monomer, respectively, at pH 8 buffer<sup>6</sup>.

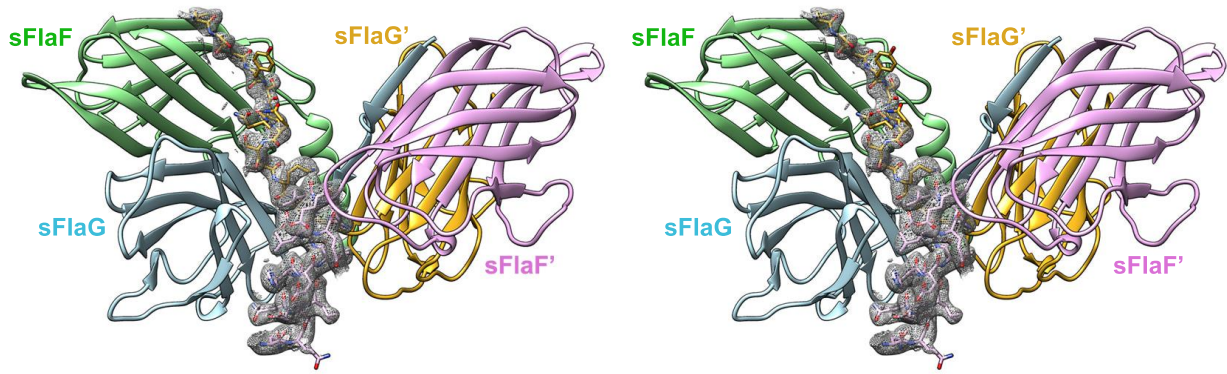

**Supplementary Figure 2: Electron density map of the sFlaG/F complex.**

Stereoview (wall-eyed) of electron density map (2Fo-Fc, gray mesh) generated from x-ray data of sFlaG/F tetrameric complex is mapped on the N-terminal  $\alpha$ -helix of sFlaF (pink) and  $\beta$ -strands of sFlaG (gold) at  $1\sigma$  contour level.

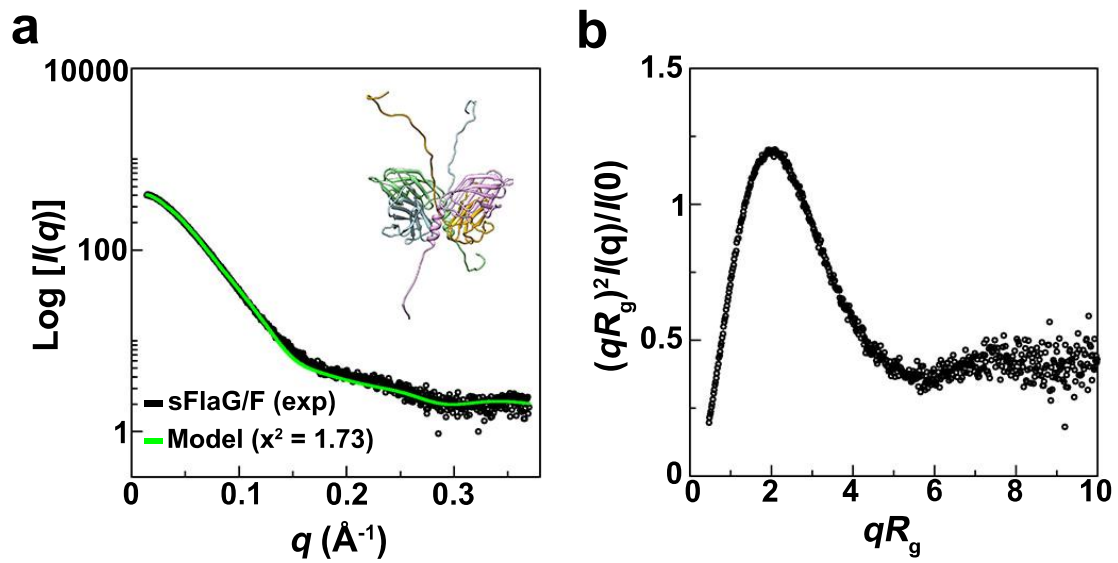

**Supplementary Figure 3: SAXS analysis of the heterotetrameric sFlaG/F**

**complex. a**, The sFlaG/F tetrameric complex model fit to SAXS experimental data shows that the N-terminal regions of sFlaG and sFlaF are flexible in solution. **b**, The dimensionless Kratky plot of the sFlaG/F complex from SAXS data exhibits a well-folded protein.

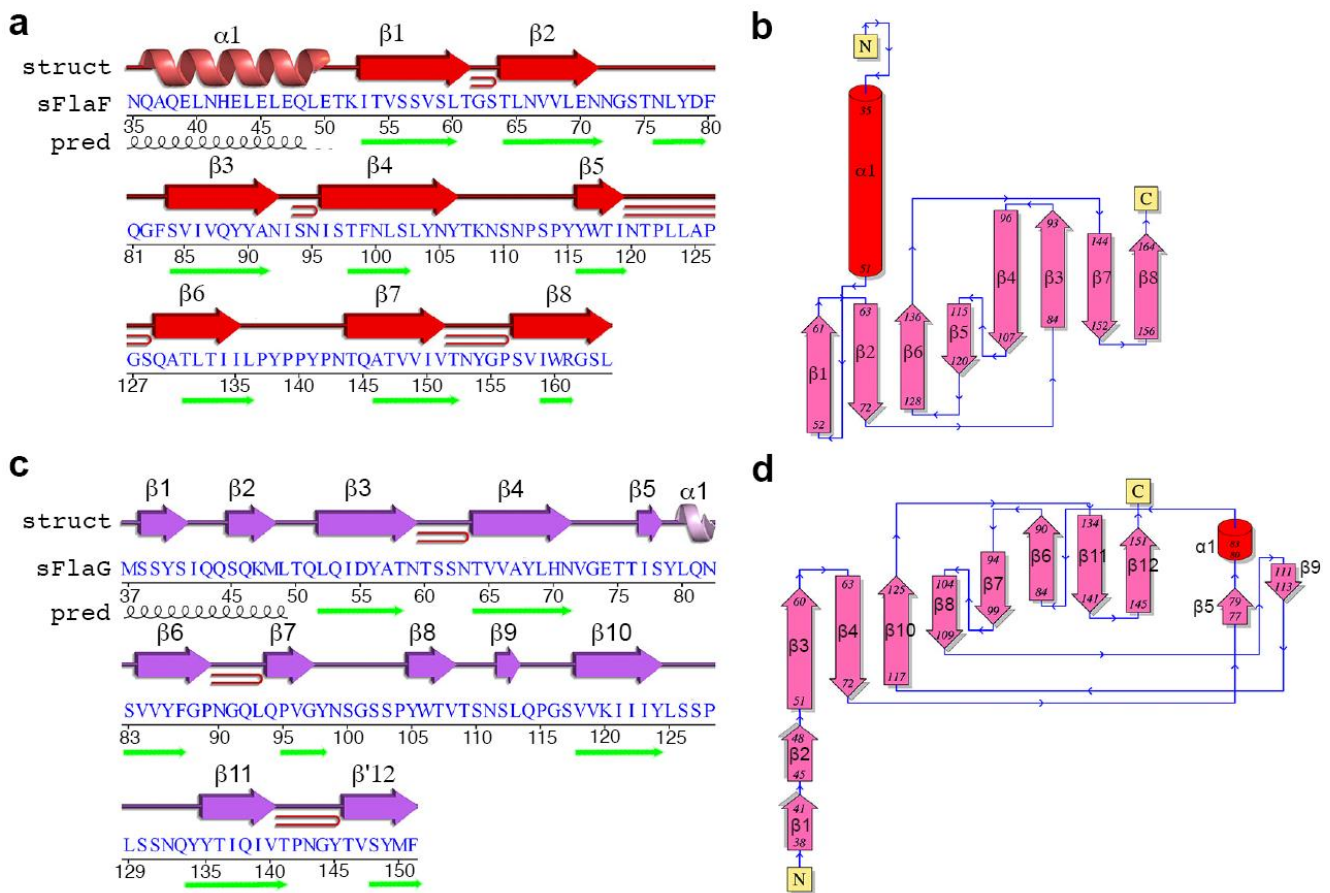

**Supplementary Figure 4: The secondary structure layout, prediction, and topology from crystal structure of the sFlaG/sFlaF complex. a, sFlaF secondary structure. b, sFlaF fold topology. c, sFlaG secondary structure. d, sFlaG fold topology. The layout and topology were generated from the PDBsum database except the  $\beta 1$  and  $\beta 1$  strands of sFlaG are annotated based on the tetrameric complex, and secondary structure prediction is generated from the Jpred4 server<sup>7</sup>.**

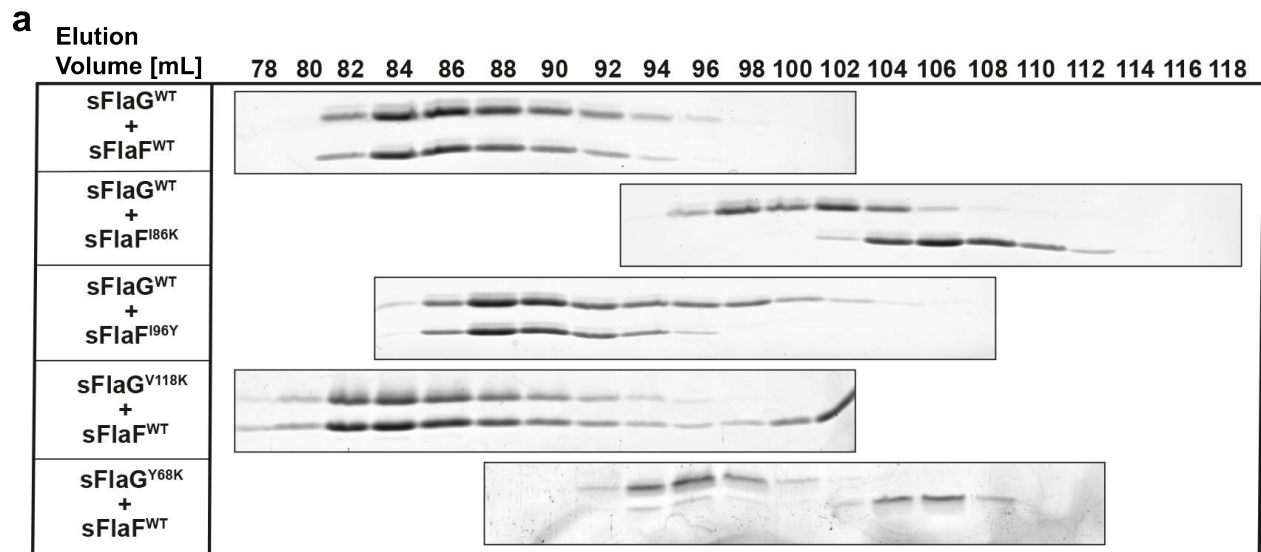

**b**

| Protein  | sFlaG <sup>WT</sup> | sFlaF <sup>WT</sup> | sFlaG <sup>Y68K</sup> | sFlaG <sup>V118K</sup> | sFlaF <sup>I86K</sup> | sFlaF <sup>I96Y</sup> | sFlaG <sup>WT</sup> /<br>sFlaF <sup>WT</sup> | sFlaG <sup>WT</sup> /<br>sFlaF <sup>I96Y</sup> | sFlaG <sup>V118K</sup> /<br>sFlaF <sup>WT</sup> |
|----------|---------------------|---------------------|-----------------------|------------------------|-----------------------|-----------------------|----------------------------------------------|------------------------------------------------|-------------------------------------------------|
| MW (kDa) | 12.5                | 26.2                | 12.5                  | 11.3                   | 13.5                  | 17.5                  | 47                                           | 34.5                                           | 53                                              |

**Supplementary Figure 5: SDS-PAGE analysis and MW calculations of the reconstituted sFlaG/sFlaF-complex after SEC. a.** The corresponding SEC fractions from figures 3a-d were analyzed on SDS-PAGE. Gels were arranged according to the respective elution volume of the fractions. **b.** The MW of each SEC peak in Fig. 3a-d was calculated from SEC elution volume according to the molecular weight standards. The theoretical MW for sFlaF and sFlaG is 16 and 15 kDa, respectively.



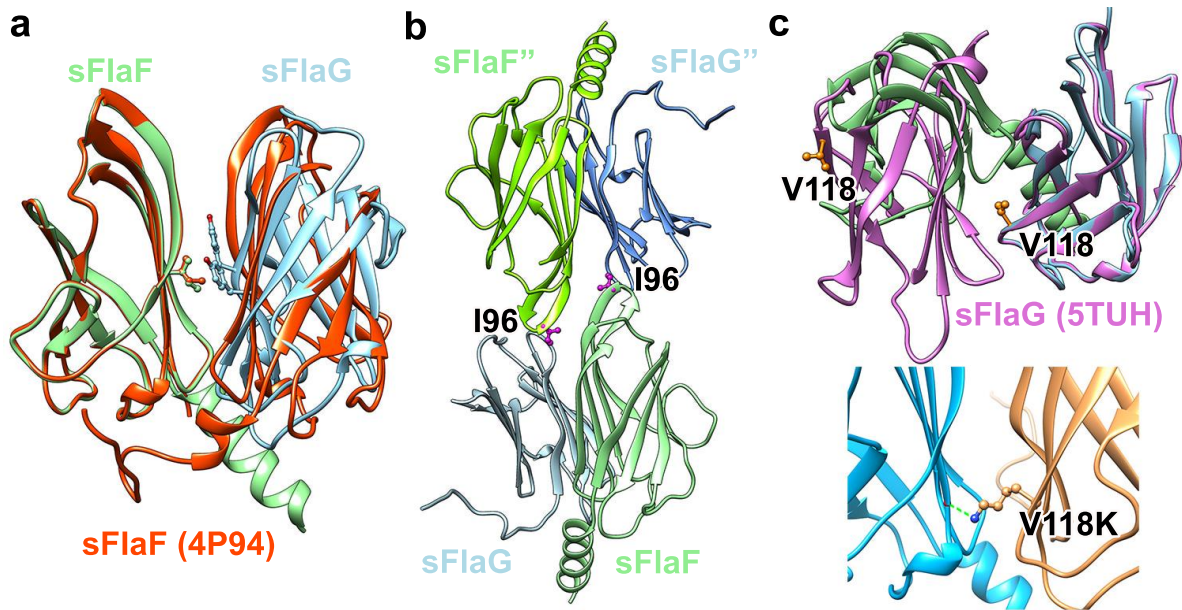

**Supplementary Figure 6: Separation-of-function mutations show that sFlaG and sFlaF share a common dimer interface.** **a**, Overlay of residue I86 on sFlaG/sFlaF dimer (PDB: 5TUG) and sFlaF-sFlaF dimer (PDB: 4P94) reveals that the same hydrophobic dimer interface was used. **b**, Residue I96 of sFlaF located at different crystallographic tetramer interfaces was substituted to tyrosine (Y) to disrupt the possible interaction. **c**, (top panel) Residue V118 located at the sFlaG (PDB: 5TUH) dimer interface was substituted to lysine (K) to disrupt the possible sFlaG dimer. (bottom panel) The crystal structure of FlaG<sup>V118K</sup>/FlaF complex showed V118K substitution does not disrupt complex formation and is hydrogen-bonding with carbonyl group of F83 on sFlaF (shown in blue).

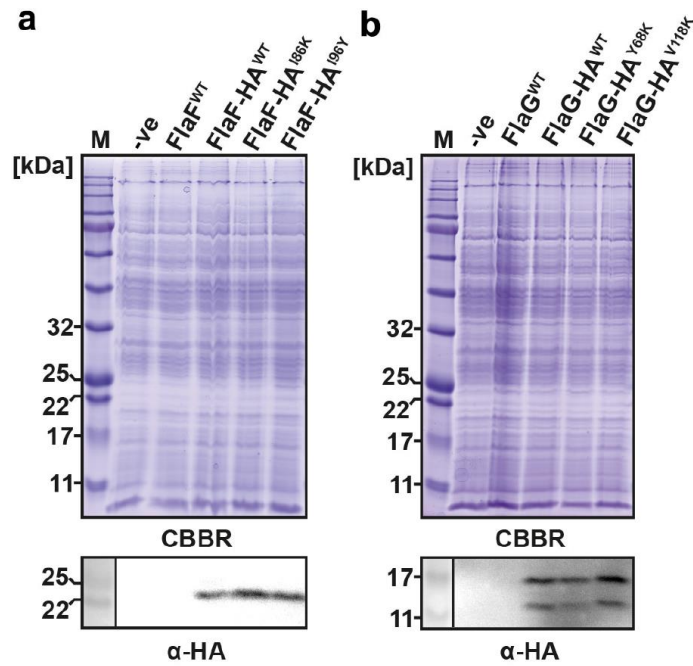

**Supplementary Figure 7: Expression level assessment of FlaF and FlaG variants for *in trans* complementation experiments.** Coomassie Brilliant Blue stained SDS-PAGE (CBBR) and anti-HA western blot ( $\alpha$ -HA) analysis of *in trans* complemented  $\Delta aapF\Delta flaF$  (a) and  $\Delta aapF\Delta flaG$  (b) strains. Empty plasmid (pSVAaraFX-HA, -ve) and untagged wild-type proteins served as negative controls, and stained SDS-PAGE served as loading control. Protein expression was induced by induction/starvation with 0.4% L-arabinose in medium lacking NZ-Amine. **a**, HA-tagged FlaF<sup>WT</sup> and variants were produced in equal amounts and detected as a single band. **b**, HA-tagged FlaG<sup>WT</sup> and variants were produced in equal amounts and detected as an upper, full-length band and a lower, degraded band.

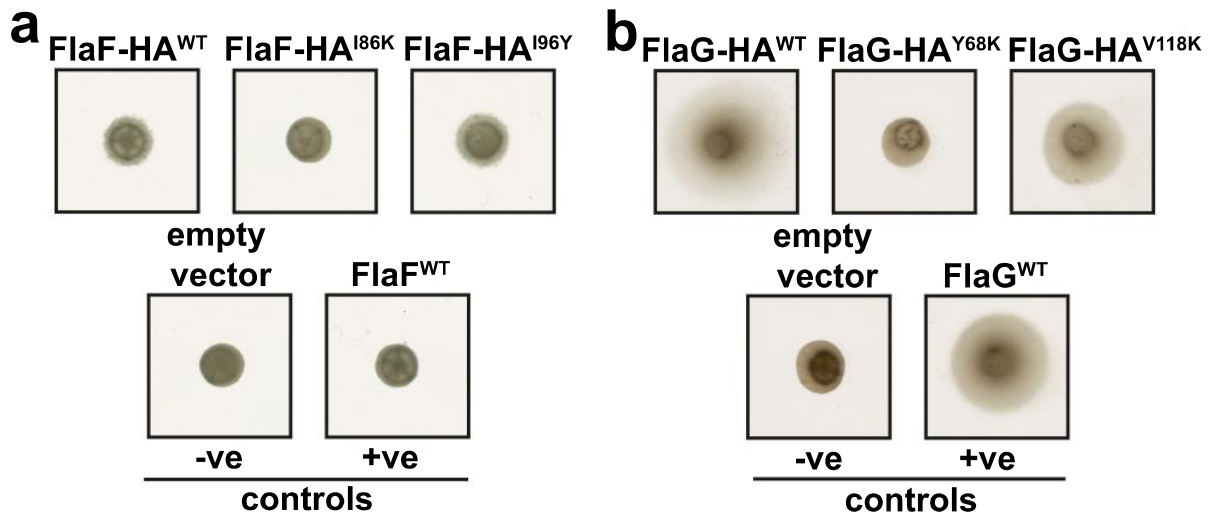

**Supplementary Figure 8: *In trans* complementation of  $\Delta aapF\Delta flaF$  and  $\Delta aapF\Delta flaG$  mutants with expression vectors carrying different FlaF or FlaG species under control of an arabinose-inducible promoter. **a**, Upon addition of 0.4% L-arabinose, motility was abolished for FlaF-overexpressing variants. Even the wild-type complementation was rendered non-motile, showing that FlaF overexpression impairs motility. **b**, Upon addition of 0.4% L-arabinose, FlaG overexpression did not impair cell motility.**

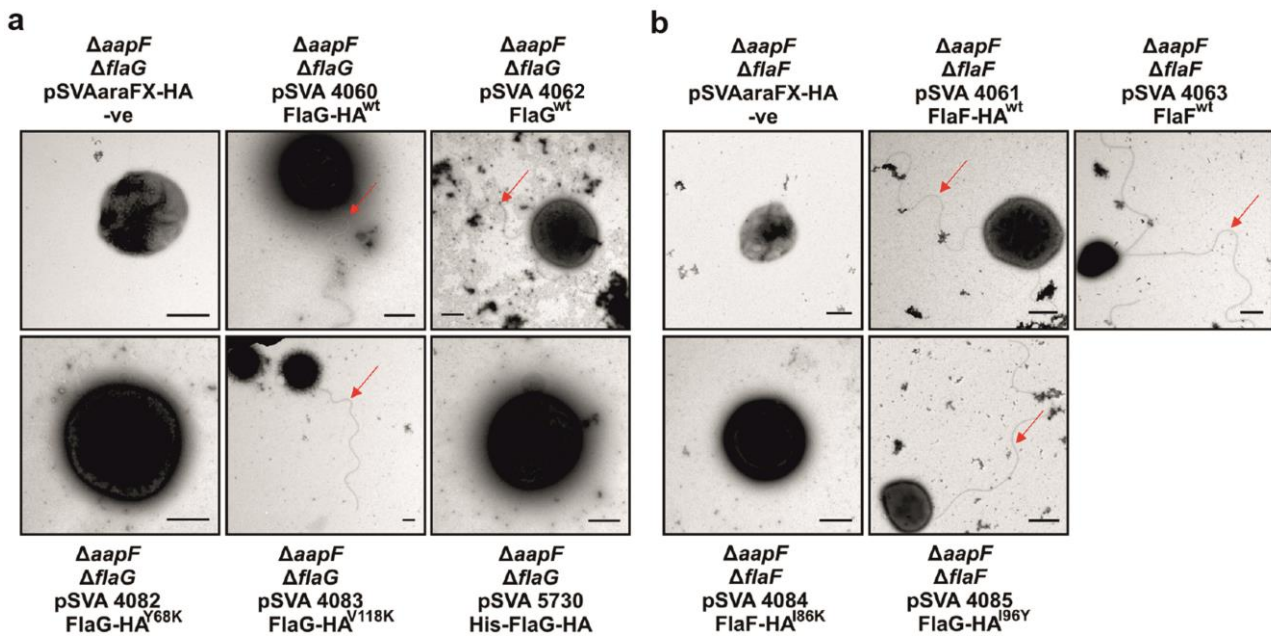

**Supplementary Figure 9: Visualization of the archaellum in FlaF and FlaG**

**variants under transmission electron microscopy. a,  $\Delta aapF\Delta flaG$  strain with**

**expressing FlaG variants. b,  $\Delta aapF\Delta flaF$  strain with expressing FlaF variants.**

Notably, FlaG-HA<sup>Y68K</sup>, His-FlaG-HA, and FlaF-HA<sup>I86K</sup> variants have no archaellum

formation. Red arrows point to archaella. Scale bars = 500 nm.

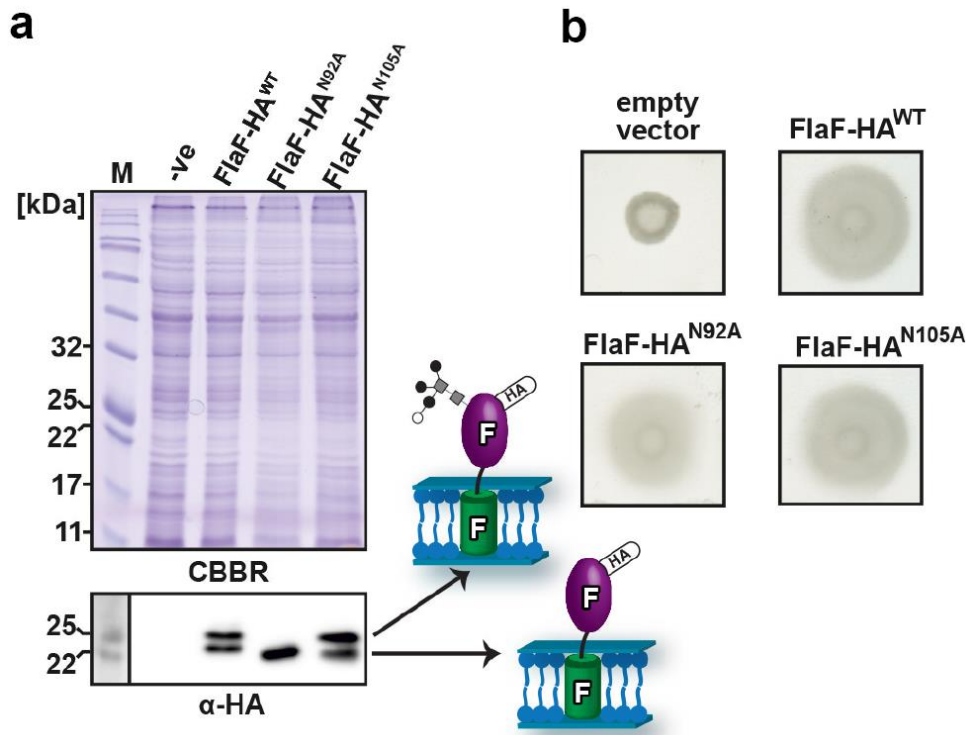

**Supplementary Figure 10: FlaF glycosylation is not essential for swimming**

**motility. a**, Membrane fractions of  $\Delta aapF\Delta flaF$  cells expressing HA-tagged wild-type FlaF and Asn-variants analyzed by Coomassie stain and anti-HA western blot. **b**, Effect of Asn-variants on motility in *S. acidocaldarius*.

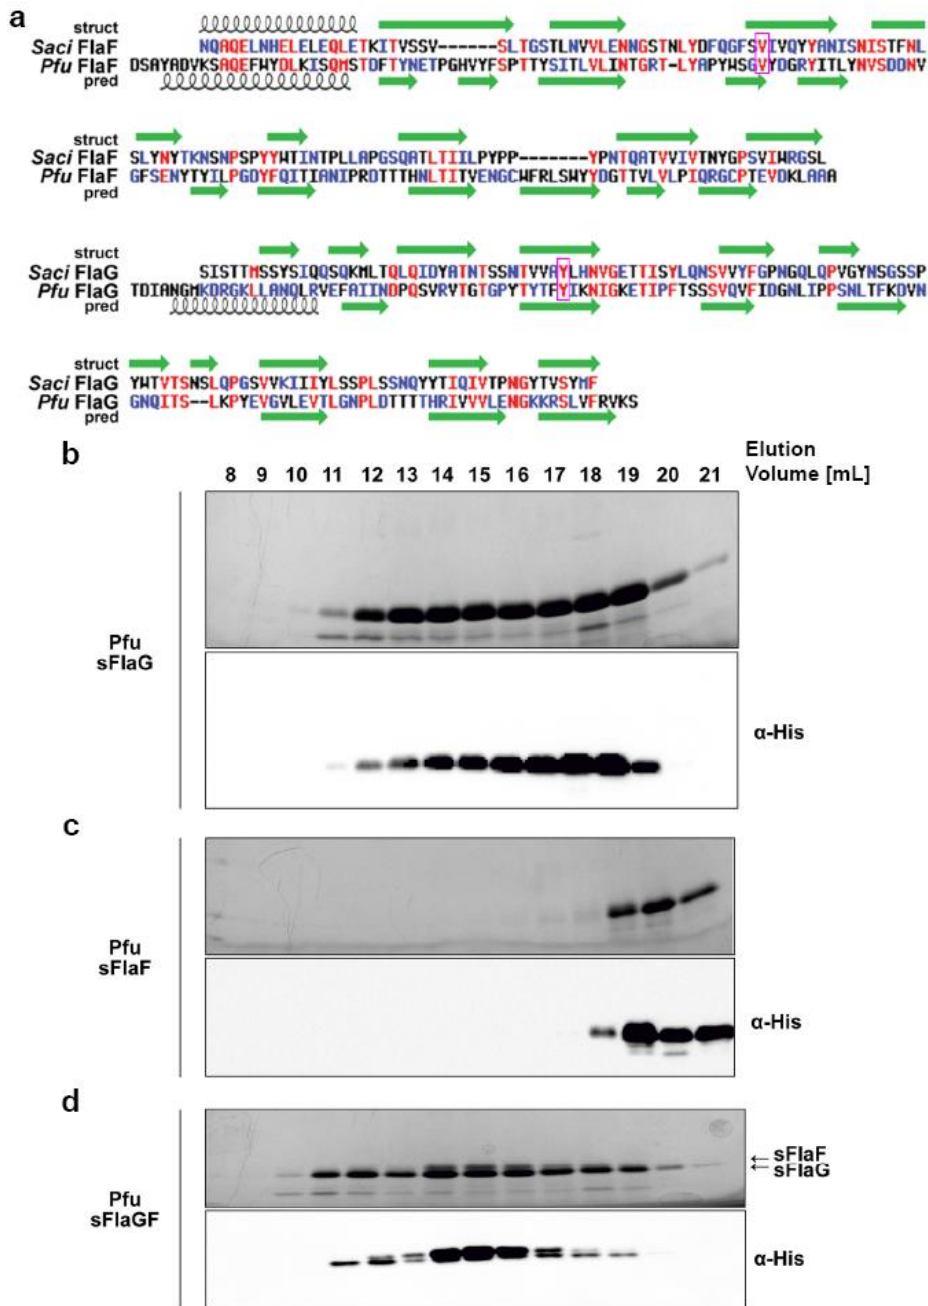

**Supplementary Figure 11: Secondary structure prediction, sequence**

**alignment, and purification of Pfu sFlaG and sFlaF.** **a**, Comparison of secondary structure between *Saci* and *Pfu* sFlaG and sFlaF. Prediction was performed in JPred 4 server<sup>7</sup>. The FlaG/F complex disrupting residues FlaF<sup>I86</sup> and FlaG<sup>Y68</sup> are shown in the pink boxes. **b-d**, SDS-PAGE and western-blot analyses of the *Pfu* sFlaG (**b**), sFlaF (**c**), and sFlaG/F (**d**) SEC elution fractions were analyzed by Coomassie-stain (top panel) and anti-His western-blot ( $\alpha$ -His).

## Supplementary Tables

**Supplementary Table 1: Summary of x-ray scattering data analysis**

| Protein Variants                                                  | sFlaG                                                                           | sFlaG/F complex<br>WT                                                           | sFlaG/F complex<br>I96Y-sFlaF                                                   | sFlaG/F complex<br>V118K-sFlaG                                                  |
|-------------------------------------------------------------------|---------------------------------------------------------------------------------|---------------------------------------------------------------------------------|---------------------------------------------------------------------------------|---------------------------------------------------------------------------------|
| <b>Data collection</b>                                            |                                                                                 |                                                                                 |                                                                                 |                                                                                 |
| Beamline                                                          | ALS BL12.3.1                                                                    | ALS BL12.3.1                                                                    | ALS BL12.3.1                                                                    | ALS BL12.3.1                                                                    |
| Beam energy, keV                                                  | 11                                                                              | 11                                                                              | 11                                                                              | 11                                                                              |
| Sample-detector<br>distance, m                                    | 1.5                                                                             | 1.5                                                                             | 1.5                                                                             | 1.5                                                                             |
| Detector                                                          | Pilatus                                                                         | Pilatus                                                                         | Pilatus                                                                         | Pilatus                                                                         |
| Exposure time (s)                                                 | Every 0.3s.<br>Total: 10.2 s.                                                   |
| Images No.                                                        | Total: 33 images                                                                | Total: 33 images                                                                | Total: 33 images                                                                | Total: 33 images                                                                |
| Sample cell<br>thickness, mm                                      | 1.5                                                                             | 1.5                                                                             | 1.5                                                                             | 1.5                                                                             |
| Temperature, K                                                    | 283                                                                             | 283                                                                             | 283                                                                             | 283                                                                             |
| Final $q$ range, $\text{\AA}^{-1}$                                | 0.01 to 0.5                                                                     | 0.01 to 0.5                                                                     | 0.01 to 0.5                                                                     | 0.01 to 0.5                                                                     |
| <b>Data analysis</b>                                              |                                                                                 |                                                                                 |                                                                                 |                                                                                 |
| Programs                                                          | SCÅTTER 3.1R                                                                    | SCÅTTER 3.1R                                                                    | SCÅTTER 3.1R                                                                    | SCÅTTER 3.1R                                                                    |
| Buffer                                                            | 25 mM citric<br>acid/sodium<br>citrate<br>(pH 3), 150mM<br>NaCl,<br>3% glycerol |
| Protein<br>concentration,<br>mg/mL                                | 1.5, 3, 5                                                                       | 2, 4, 6                                                                         | 1.5, 2, 3                                                                       | 0.95, 1.4, 1.9                                                                  |
| Points used for<br>Guinier analysis                               | 1-38                                                                            | 1-53                                                                            | 1-62                                                                            | 1-51                                                                            |
| Guinier $qR_g$ limits                                             | 1.3                                                                             | 1.3                                                                             | 1.3                                                                             | 1.3                                                                             |
| $I(0)$ , $\text{cm}^{-1}$                                         | $45.030 \pm 0.498$                                                              | $442.400 \pm 1.037$                                                             | $214.700 \pm 1.081$                                                             | $16.810 \pm 0.050$                                                              |
| Guinier $R_g$ , $\text{\AA}$                                      | $36.31 \pm 0.22$                                                                | $32.15 \pm 0.38$                                                                | $28.10 \pm 0.80$                                                                | $32.29 \pm 0.50$                                                                |
| $D_{\text{max}}$ , $\text{\AA}$                                   | 180                                                                             | 125                                                                             | 82                                                                              | 125                                                                             |
| $R_g$ (real), $\text{\AA}$                                        | $43.91 \pm 2.74$                                                                | $33.97 \pm 0.16$                                                                | $26.74 \pm 0.04$                                                                | $34.26 \pm 0.32$                                                                |
| $R_g$ (reciprocal), $\text{\AA}$                                  | 43.55                                                                           | 33.82                                                                           | 26.75                                                                           | 34.05                                                                           |
| MW estimation,<br>kDa*                                            | 24..49                                                                          | 57.06                                                                           | 50.85                                                                           | 61.27                                                                           |
| Porod volume, $\text{\AA}^3$<br>( $q$ -range, $\text{\AA}^{-1}$ ) | 186874 (0.085 –<br>0.140)                                                       | 129162 (0.093 –<br>0.130)                                                       | 104487 (0.090 –<br>0.108)                                                       | 128994 (0.090 –<br>0.106)                                                       |
| Porod Exponent                                                    | $1.61 \pm 0.05$                                                                 | $3.71 \pm 0.02$                                                                 | $3.92 \pm 0.02$                                                                 | $3.72 \pm 0.05$                                                                 |
| SASBDB ID                                                         | SASDEU7                                                                         | SASDES7                                                                         | SASDEV7                                                                         | SASDET7                                                                         |

\*MW is estimated based on  $MW = \frac{(V_c)2/R_g}{0.1231}$  using SCÅTTER program 3.1R  
(<http://www.bioisis.net/scatter>)

**Supplementary Table 2. X-ray diffraction data collection and refinement statistics for sFlaG and the sFlaG/sFlaF complexes**

|                                              | sFlaG/sFlaF                    | sFlaG <sup>V118K</sup> /<br>sFlaF | sFlaG                          | sFlaG                          |                                |                                |
|----------------------------------------------|--------------------------------|-----------------------------------|--------------------------------|--------------------------------|--------------------------------|--------------------------------|
|                                              | Complex                        | Complex                           | Native                         | (Pt)                           |                                |                                |
| <b>Data collection</b>                       |                                |                                   |                                |                                |                                |                                |
| Space group                                  | P6 <sub>1</sub>                | P6 <sub>1</sub>                   | C222 <sub>1</sub>              | C222 <sub>1</sub>              |                                |                                |
| Cell dimensions                              |                                |                                   |                                |                                |                                |                                |
| $a, b, c$ (Å)                                | 119.95<br>119.95<br>152.44     | 120.038<br>120.038<br>152.138     | 83.02,<br>100.32, 62.82        | 83.52, 99.32,<br>62.21         |                                |                                |
| $\alpha, \beta, \gamma$ (°)                  | 90.00 90.00<br>120.00          | 90.00 90.00<br>120.00             | 90.00 90.00<br>90.00           | 90.00 90.00<br>90.00           |                                |                                |
|                                              |                                |                                   |                                | <i>Peak</i>                    | <i>Inflection</i>              | <i>Remote</i>                  |
| Wavelength                                   | 0.9918                         | 0.9795                            | 1.0714                         | 1.0714                         | 1.0718                         | 1.0448                         |
| Resolution (Å)                               | 49.16 – 2.47<br>(2.56 – 2.47)* | 49.19 – 2.80<br>(2.96 – 2.80)*    | 44.82 – 1.93<br>(1.97 – 1.93)* | 44.58 – 2.50<br>(2.60 – 2.50)* | 44.61 – 2.50<br>(2.60 – 2.50)* | 44.59 – 2.50<br>(2.60 – 2.50)* |
| $R_{\text{sym}}$ or $R_{\text{merge}}$       | 0.10 (1.23)                    | 0.08 (1.17)                       | 0.09 (0.97)                    | 0.10 (0.54)                    | 0.11 (0.67)                    | 0.10 (0.58)                    |
| $\langle I \rangle / \langle \sigma \rangle$ | 19.2 (2.4)                     | 16.4 (1.5)                        | 14.9 (2.1)                     | 21.5 (5.1)                     | 21.1 (4.1)                     | 21.4 (4.9)                     |
| Completeness (%)                             | 100 (100)                      | 99.9 (99.7)                       | 100 (99.6)                     | 99.7 (99.0)                    | 99.7 (99.4)                    | 99.7 (99.2)                    |
| Redundancy                                   | 11.4 (11.5)                    | 6.8 (6.8)                         | 7.2 (7)                        | 14.3 (13.9)                    | 14.4 (13.9)                    | 14.4 (14.5)                    |
| <b>Refinement</b>                            |                                |                                   |                                |                                |                                |                                |
| Resolution (Å)                               | 49.15 – 2.47                   | 39.29 – 2.81                      | 44.82 – 1.93                   |                                |                                |                                |
| No. reflections                              | 44511                          | 30378                             | 20093                          |                                |                                |                                |
| $R_{\text{work}} / R_{\text{free}}$          | 16.3/19.4                      | 17.1/20.2                         | 18.1/21.3                      |                                |                                |                                |
| No. atoms                                    |                                |                                   |                                |                                |                                |                                |
| Protein                                      | 3836                           | 3858                              | 1644                           |                                |                                |                                |
| Water                                        | 184                            | 147                               | 135                            |                                |                                |                                |



---

|                     |       |       |       |
|---------------------|-------|-------|-------|
| <i>B</i> -factors   | 51.44 | 75.88 | 33.86 |
| Protein             | 51.48 | 75.60 | 33.12 |
| Ligand/ion          |       |       |       |
| Water               | 51.81 | 76.67 | 42.27 |
| R.m.s<br>deviations |       |       |       |
| Bond<br>lengths (Å) | 0.008 | 0.008 | 0.007 |
| Bond<br>angles (°)  | 0.985 | 1.070 | 0.815 |

---

### Supplementary Table 3: Strains, plasmids and primers

#### *Escherichia coli* strains

| Strain            | Genotype                                                                                                                                                                                                                                                                                                                            | Source                    |
|-------------------|-------------------------------------------------------------------------------------------------------------------------------------------------------------------------------------------------------------------------------------------------------------------------------------------------------------------------------------|---------------------------|
| NEB 10 beta       | $\Delta(\text{ara-leu})$ 7697 <i>araD</i> 139 <i>fhuA</i> $\Delta\text{lacX74}$<br><i>galK</i> 16 <i>galE</i> 15 <i>e14-<math>\phi</math>80</i> $\Delta\text{lacZ}$ $\Delta\text{M15}$ <i>recA</i> 1<br><i>relA</i> 1 <i>endA</i> 1 <i>nupG</i> <i>rpsL</i> (StrR) <i>rph</i> <i>spoT</i> 1<br>$\Delta$ ( <i>mrr-hsdRMS-mcrBC</i> ) | New<br>England<br>Biolabs |
| Rosetta(DE3)pLysS | F- <i>ompT gal dcm lon?</i> <i>hsdSB(rB-mB-)</i><br>$\lambda$ (DE3 [ <i>lacI lacUV5-T7p07 ind1 sam7</i><br><i>nin5</i> ] [ <i>malB+</i> ]K-12( $\lambda$ S) pLysSRARE<br>[T7p20 <i>ileX argU thrU tyrU glyT thrT argW</i><br><i>metT leuW proL orip15A</i> ](CmR)                                                                   | Novagen                   |
| ER1821            | F- <i>glnV44 e14-(McrA-)</i> <i>rfbD1 relA1 endA1</i><br><i>spoT1</i>                                                                                                                                                                                                                                                               | New<br>England<br>Biolabs |

#### *Sulfolobus acidocaldarius* strains

| Strain | Genotype                                                                 | Source            |
|--------|--------------------------------------------------------------------------|-------------------|
| MW001  | DSM 639 $\Delta\text{pyrEF}$ (91-412 bp)                                 | Ref. <sup>8</sup> |
| MW453  | $\Delta\text{pyrEF}$ (91-412 bp) $\Delta\text{aapF}$ $\Delta\text{flaG}$ | Ref. <sup>9</sup> |
| MW454  | $\Delta\text{pyrEF}$ (91-412 bp) $\Delta\text{aapF}$ $\Delta\text{flaF}$ | Ref. <sup>9</sup> |
| MW502  | $\Delta\text{pyrEF}$ (91-412 bp) $\Delta\text{aapF}$ $\Delta\text{pibD}$ | This study        |

#### *Sulfolobus islandicus* strains

| Strain              | Genotype                                                                                                          | Source             |
|---------------------|-------------------------------------------------------------------------------------------------------------------|--------------------|
| RJW004              | $\Delta\text{pyrEF}$ $\Delta\text{lacS}$ $\Delta\text{argD}$ ; Derived from <i>S.</i><br><i>islandicus</i> M.16.4 | Ref. <sup>10</sup> |
| $\Delta\text{slaA}$ | $\Delta\text{pyrEF}$ $\Delta\text{lacS}$ $\Delta\text{argD}$ $\Delta\text{slaA}$                                  | Ref. <sup>11</sup> |

|                |                                                     |                    |
|----------------|-----------------------------------------------------|--------------------|
| $\Delta slaB$  | $\Delta pyrEF \Delta lacS \Delta argD \Delta slaB$  | Ref. <sup>11</sup> |
| $\Delta slaAB$ | $\Delta pyrEF \Delta lacS \Delta argD \Delta slaAB$ | Ref. <sup>11</sup> |

## Plasmids

| Plasmid        | Relevant characteristics                                                                                                                                                                                                      | Source                     |
|----------------|-------------------------------------------------------------------------------------------------------------------------------------------------------------------------------------------------------------------------------|----------------------------|
| pET-Duet 1     | Amp <sup>r</sup> expression plasmid containing replicon ColE1 (pBR322) and two MCS (MCS1 and MCS2)                                                                                                                            | Novagen                    |
| pSVAaraFX-HA   | Plasmid for expression in <i>S. acidocaldarius</i> based on pSVAmZ-SH10 <sup>83</sup> with <i>ara</i> -promoter; containing MCS compatible with FX-cloning primers <sup>84</sup> adding C-terminal HA-tag to gene of interest | Wagner et al., unpublished |
| pSVAaraFX-stop | Plasmid for expression in <i>S. acidocaldarius</i> based on pSVAmZ-SH10 <sup>83</sup> with <i>ara</i> -promoter; containing MCS compatible with FX-cloning primers <sup>84</sup>                                              | Wagner et al., unpublished |
| pSVA 1921      | Amp <sup>r</sup> , pET-Duet 1 based expression vector, carrying N-terminal His <sub>6</sub> -tagged Saci <i>sflaF</i> in MCS 1, using EcoRI/HindIII restriction sites                                                         | Ref. <sup>6</sup>          |
| pSVA 2816      | Amp <sup>r</sup> , pSVA 1921 based expression vector, carrying Saci <i>sflaF</i> <sup>86K</sup> , using site-directed mutagenesis PCR                                                                                         | Ref. <sup>6</sup>          |
| pSVA 2822      | Amp <sup>r</sup> , pET-Duet 1 based expression vector, carrying N-terminal His <sub>6</sub> -tagged Pfu <i>sflaF</i> in MCS 1, using EcoRI/HindIII restriction sites                                                          | This study                 |
| pSVA 2826      | Amp <sup>r</sup> , pET-Duet 1 based expression vector, carrying N-terminal His <sub>6</sub> -tagged Saci <i>sflaG</i> in MCS 1, using EcoRI/HindIII restriction sites                                                         | This study                 |
| pSVA 4060      | Amp <sup>r</sup> , pSVAaraFx-HA expression vector, carrying C-terminal hemagglutinin-tagged Saci <i>flaG</i> , using NcoI/XhoI restriction sites                                                                              | This study                 |
| pSVA 4061      | Amp <sup>r</sup> , pSVAaraFX-HA expression vector, carrying C-terminal hemagglutinin-tagged Saci <i>flaF</i> , using NcoI/XhoI restriction sites                                                                              | This study                 |

|           |                                                                                                                                                                      |            |
|-----------|----------------------------------------------------------------------------------------------------------------------------------------------------------------------|------------|
| pSVA 4062 | Amp <sup>r</sup> , pSVAaraFX-stop expression vector, carrying Saci <i>flaG</i> , using NcoI/XhoI restriction sites                                                   | This study |
| pSVA 4063 | Amp <sup>r</sup> , pSVAaraFX-stop expression vector, carrying Saci <i>flaF</i> , using NcoI/XhoI restriction sites                                                   | This study |
| pSVA 4014 | Amp <sup>r</sup> , pET-Duet 1 based expression vector, carrying N-terminal His <sub>6</sub> -tagged Pfu <i>sflaG</i> in MCS 1, using EcoRI/HindIII restriction sites | This study |
| pSVA 4015 | Amp <sup>r</sup> , pSVA 2826 based expression vector, carrying Saci <i>sflaG</i> <sup>V118K</sup> , using site-directed mutagenesis PCR                              | This study |
| pSVA 4016 | Amp <sup>r</sup> , pSVA 2826 based expression vector, carrying Saci <i>sflaG</i> <sup>Y68K</sup> , using site-directed mutagenesis PCR                               | This study |
| pSVA 4019 | Amp <sup>r</sup> , pSVA 1921 based expression vector, carrying Saci <i>sflaF</i> <sup>F96Y</sup> , using site-directed mutagenesis PCR                               | This study |
| pSVA 4082 | Amp <sup>r</sup> , pSVA 4060 based expression vector, carrying Saci <i>flaG</i> <sup>Y68K</sup> , using site-directed mutagenesis PCR                                | This study |
| pSVA 4083 | Amp <sup>r</sup> , pSVA 4060 based expression vector, carrying Saci <i>flaG</i> <sup>V118K</sup> , using site-directed mutagenesis PCR                               | This study |
| pSVA 4084 | Amp <sup>r</sup> , pSVA 4061 based expression vector, carrying Saci <i>flaF</i> <sup>F86K</sup> , using site-directed mutagenesis PCR                                | This study |
| pSVA 4085 | Amp <sup>r</sup> , pSVA 4061 based expression vector, carrying Saci <i>flaF</i> <sup>F96Y</sup> , using site-directed mutagenesis PCR                                | This study |
| pSVA 4087 | Amp <sup>r</sup> , pSVA 4061 based expression vector, carrying Saci <i>flaF</i> <sup>N92A</sup> , using site-directed mutagenesis PCR                                | This study |
| pSVA 4088 | Amp <sup>r</sup> , pSVA 4061 based expression vector, carrying Saci <i>flaF</i> <sup>N105A</sup> , using site-directed mutagenesis PCR                               | This study |
| pSVA 5730 | Amp <sup>r</sup> , pSVA 4060 based expression vector, carrying Saci <i>His<sub>6</sub>-flaG</i> , using using overlap PCR to insert the additional tag               | This study |

## Primers

| Primer | Sequence and Characteristics                                                                                              | Source            |
|--------|---------------------------------------------------------------------------------------------------------------------------|-------------------|
| 3749   | CCCGAATTCGATCTCTACGACAATGTC, forward primer<br>for Saci <i>sflaG</i> containing EcoRI restriction site                    | This study        |
| 2143   | GGGGAAGCTTTCAAACATGTAATAACAG; reverse<br>primer for Saci <i>sflaG</i> containing HindIII restriction site                 | This study        |
| 3760   | CAAGGTTTTTCCGTTAAAGTACAATACTATGC<br>forward primer for Saci FlaF I86K mutation                                            | Ref. <sup>6</sup> |
| 3761   | GCTAATGTTAGCATAGTATTGTACTTTAACGG<br>reverse primer for Saci FlaF I86K mutation                                            | Ref. <sup>6</sup> |
| 3741   | GGGGGAATTCGTGGGACAGTGCTTACGCTGACG,<br>forward primer for Pfu <i>sflaF</i> containing EcoRI restriction<br>site            | This study        |
| 3742   | GGGGAAGCTTGTCCACCTCCGTTGGGCAGCCTCTCT<br>GGATG, reverse primer for Pfu <i>sflaF</i> containing HindIII<br>restriction site | This study        |
| 6657   | GCGGAATTCGACAGATATAGCCAATGGCATG, forward<br>primer for Pfu <i>sflaG</i> containing EcoRI restriction site                 | This study        |
| 6658   | CGCAAGCTTTTAACTTTTCACTCTAAATACGAGAGATC<br>, reverse primer for Pfu <i>sflaG</i> containing HindIII restriction<br>site    | This study        |
| 6667   | CTATGCTAACATTAGCAATTATTCAACTTTCAATC<br>forward primer for Saci FlaF I96Y mutation                                         | This study        |

|      |                                                                                                               |            |
|------|---------------------------------------------------------------------------------------------------------------|------------|
| 6668 | CGAGAGATTGAAAGTTGAATAATTGCTAATGTTAG<br>reverse primer for Saci FlaF I96Y mutation                             | This study |
| 6659 | CACTACAGCCAGGGTCAAAAGTAAAATCATTATC<br>forward primer for Saci FlaG V118K mutation                             | This study |
| 6660 | GACAAATAGATAATGATTTTTACTTTTGACCCTGGCTG<br>reverse primer for Saci FlaG V118K mutation                         | This study |
| 6661 | CTCAAACACTGTAGTTGCAAAATTACATAATGTGG<br>forward primer for Saci FlaG Y68K mutation                             | This study |
| 6662 | GTTTCCCCCACATTATGTAATTTTGCAACTACAGTG<br>reverse primer for Saci FlaG Y68K mutation                            | This study |
| 8236 | GCGCCATGGTTAGTGAGGTTATAAGTGAGAC; forward<br>primer for Saci <i>flaG</i> containing NcoI restriction site      | This study |
| 8215 | CGCCTCGAGGCTTACCTTAAACATGTA ACTAAC<br>reverse primer for Saci <i>flaG</i> containing XhoI restriction<br>site | This study |
| 8237 | GCGCCATGGGAGTGTCACAACTTTG; forward primer<br>for Saci <i>flaF</i> containing NcoI restriction site            | This study |
| 8216 | CGCCTCGAGTAGGCTTCCCCTCCATATTAC; reverse<br>primer for Saci <i>flaF</i> containing XhoI restriction site       | This study |
| 8246 | GTTATAGTACAATACTATGCTGCCATTAGCAATATCTC<br>AACTTTC<br>forward primer for Saci FlaF N92A mutation               | This study |
| 8247 | GTTGAGATATTGCTAATGGCAGCATAGTATTGTA<br>CTA<br>TAACGG<br>reverse primer for Saci FlaF N92A mutation             | This study |

|      |                                                                                                                              |            |
|------|------------------------------------------------------------------------------------------------------------------------------|------------|
| 8248 | CTTTCAATCTCTCGTTATATGCCTACACAAAGAACTCT<br>AACC forward primer for Saci FlaF N105A mutation                                   | This study |
| 8249 | GAGTTCTTTGTGTAGGCATATAACGAGAGATTGAAAG<br>TTGAG<br>reverse primer for Saci FlaF N105A mutation                                | This study |
| 9268 | CATCACCATCACCATCACGTTAGTGAGGTTATAAGTG<br>AGACCATTATG; forward primer to add His <sub>6</sub> -tag to Saci<br>FlaG N-terminus | This study |
| 9269 | GTGATGGTGATGGTGATGCATGGTATGATAAGTAAGA<br>CGCTTATC; reverse primer to add His <sub>6</sub> -tag to Saci FlaG<br>N-terminus    | This study |

## Supplementary References

1. Krissinel, E. & Henrick, K. Inference of Macromolecular Assemblies from Crystalline State. *J. Mol. Biol.* **372**, 774–797 (2007).
2. Webb, B. & Sali, A. Comparative protein structure modeling using MODELLER. *Curr. Protoc. Bioinforma.* **2016**, 5.6.1-5.6.37 (2016).
3. Schneidman-Duhovny, D., Hammel, M., Tainer, J. A. & Sali, A. FoXS, FoXSDock and MultiFoXS: Single-state and multi-state structural modeling of proteins and their complexes based on SAXS profiles. *Nucleic Acids Res.* **44**, W424–W429 (2016).
4. Rambo, R. P. & Tainer, J. A. Super-Resolution in Solution X-Ray Scattering and Its Applications to Structural Systems Biology. *Annu. Rev. Biophys.* **42**, 415–441 (2013).
5. R. Gupta, E. J. and S. B. Prediction of N-glycosylation sites in human proteins. Unpublished
6. Banerjee, A. *et al.* FlaF is a  $\beta$ -sandwich protein that anchors the archaellum in the archaeal cell envelope by binding the S-layer protein. *Structure* **23**, 863–872 (2015).
7. Drozdetskiy, A., Cole, C., Procter, J. & Barton, G. J. JPred4: A protein secondary structure prediction server. *Nucleic Acids Res.* **43**, W389–W394 (2015).
8. Wagner, M. *et al.* Versatile genetic tool box for the crenarchaeote *Sulfolobus acidocaldarius*. *Front. Microbiol.* **3**, (2012).
9. Lassak, K. *et al.* Molecular analysis of the crenarchaeal flagellum. *Mol. Microbiol.* **83**, 110–124 (2011).
10. Zhang, C., Cooper, T. E., Krause, D. J. & Whitaker, R. J. Augmenting the genetic toolbox for *Sulfolobus islandicus* with a stringent positive selectable marker for agmatine prototrophy. *Appl. Environ. Microbiol.* **79**, 5539–5549 (2013).
11. Zhang, C., Phillips, A. P. R., Wipfler, R. L., Olsen, G. J. & Whitaker, R. J. The essential genome of the crenarchaeal model *Sulfolobus islandicus*. *Nat.*



*Commun.* **9**, 4908 (2018).
